# Supplementary material for: Multi-stimuli-responsive bottlebrush-colloid Janus nanoparticles toward emulsion interfacial manipulation and catalysis
Source: Royal Society of Chemistry journal article supplement (doi:10.1039/d1py01606g), 2022-01-01
Supplement: d1py01606g1.pdf [file d1py01606g1.pdf]

## Supporting Information

# Multi-stimuli Responsive Bottlebrush-Colloid Janus Nanoparticles Toward Emulsion Interfacial Manipulation and Catalysis

Xi Chen,<sup>\*ab</sup> Zhangyan Chen,<sup>c</sup> and Li Ma<sup>ab</sup>

<sup>a</sup>Department of Materials Science, Fudan University, Shanghai 200433, China

<sup>b</sup>Zhuhai Fudan Innovation Institute, Zhuhai 518057, China

<sup>c</sup>School of Light Industry and Engineering, South China University of Technology, Guangzhou 510641, China

\*E-mail: xichen1678f@163.com

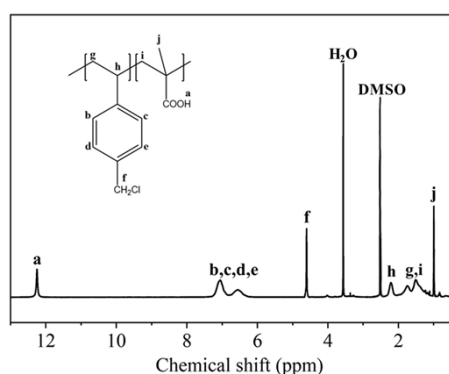

**Fig. S1** <sup>1</sup>H NMR spectrum of PVBC<sub>11.0k</sub>-*b*-PMAA<sub>11.2k</sub>.

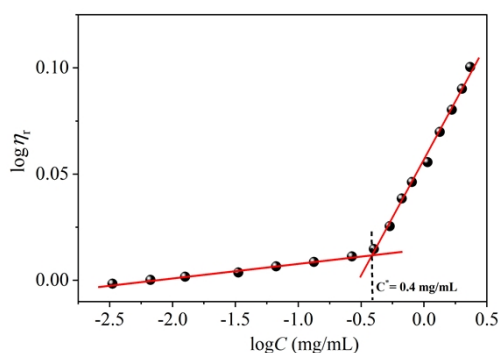

**Fig. S2** Relationship between relative viscosity and the concentration of PVBC<sub>11.0k</sub>-*b*-

PMAA<sub>11.2k</sub> solution in DMF, deviating from the Einstein's viscosity equation at 0.4 mg/mL.

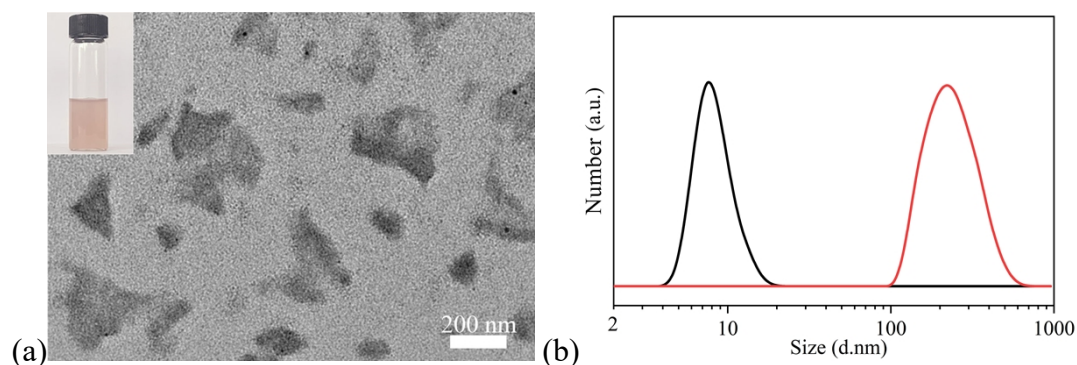

**Fig. S3** (a) TEM image and (b) DLS trace of PVBC-*b*-PMAA after crosslinking with Co<sup>2+</sup> at a polymer concentration of 10 mg/mL.

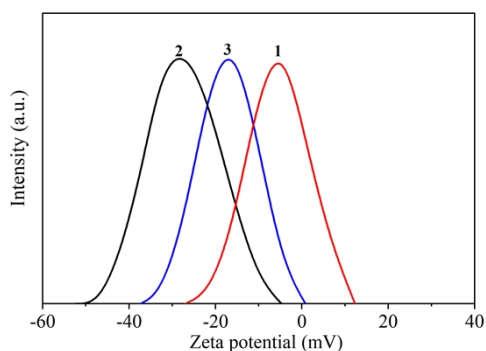

**Fig. S4** Zeta potential of (1) PVBC-*b*-PMAA in DMF, (2) after the deprotonation by adding NaOH and (3) after the crosslinking with Co<sup>2+</sup>.

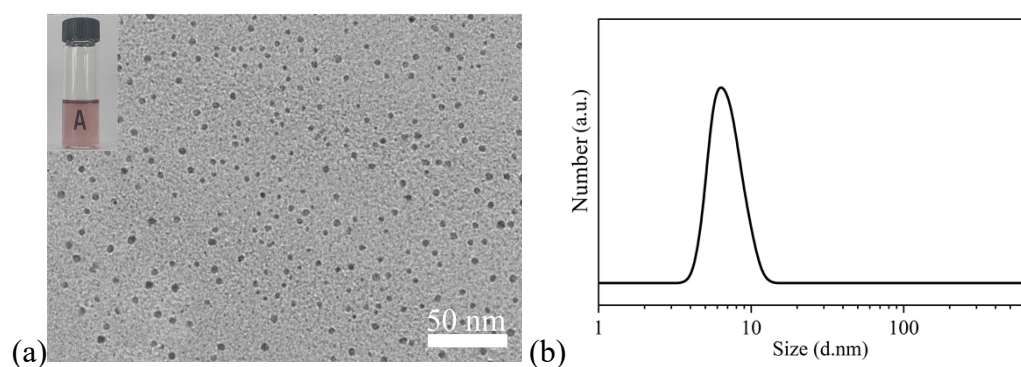

**Fig. S5** (a) TEM image and (b) DLS trace of PVBC-*b*-PMAA after electrostatic-mediated intramolecular crosslinking with Co<sup>2+</sup> at a polymer concentration of 10 mg/mL.

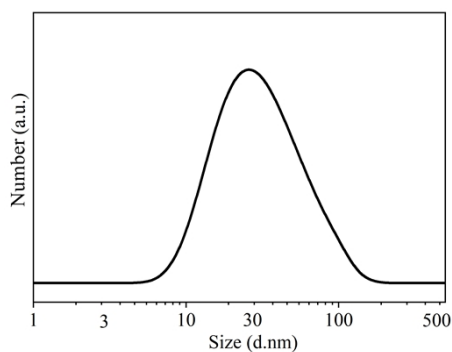

**Fig. S6** DLS trace of PVBC-*b*-PMAA after electrostatic-mediated intramolecular crosslinking with  $\text{Co}^{2+}$  (22% molar ratio with respect to MAA) at a polymer concentration of 30 mg/mL.

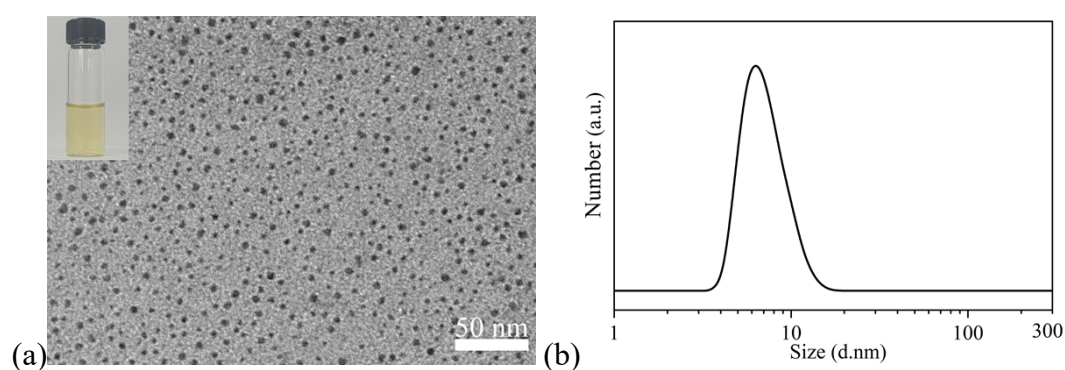

**Fig. S7** TEM image (a) and DLS trace (b) of PVBC-*b*-PMAA after electrostatic-mediated intramolecular crosslinking with  $\text{K}_2\text{PdCl}_4$  at a polymer concentration of 30 mg/mL.

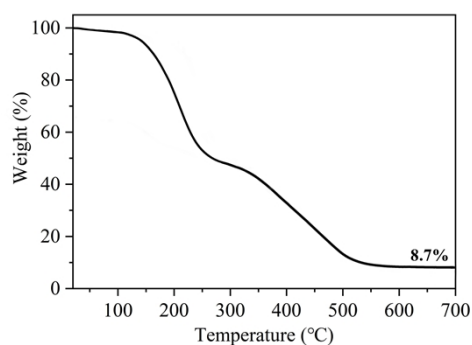

**Fig. S8** TGA trace of PVBC-*c*PMAA@Co.

For PVBC-*c*PMAA@Co, the theoretic weight fraction of cobalt can be calculated as:

$$f_{\text{Co}} = m_{\text{Co}} / (m_{\text{Co}} + m_{\text{polymer}}) \times 100\%$$

In the experimental section, 21.0 mg (0.071 mmol) of  $\text{Co}(\text{NO}_3)_2 \cdot 6\text{H}_2\text{O}$  was reacted with 60 mg ( $2.73 \times 10^{-3}$  mmol) of PVBC<sub>11k</sub>-*b*-PMAA<sub>11.2k</sub>. The weight fraction of Co in  $\text{Co}(\text{NO}_3)_2 \cdot 6\text{H}_2\text{O}$  is 0.203. Therefore, the theoretical of  $m_{\text{Co}} = 21 \times 0.203 = 4.26$  mg in the final product. The

theoretical weight of PVBC-cPMAA@Co= $m_{\text{Co}}+m_{\text{polymer}}=4.26+60=64.26$  mg. The theoretical cobalt weight ratio is:  $f_{\text{Co}} = 4.26/64.26 \times 100\% = 6.6\%$ .

The TGA is conducted in air to achieve a full elimination of the polymer, and the final product is  $\text{Co}_3\text{O}_4$ .<sup>1</sup> Therefore, the weight fraction of Co in the PVBC-cPMAA@Co is  $177/241 \times 8.7\% = 6.4\%$ , which is in a good agreement of the theoretical value.

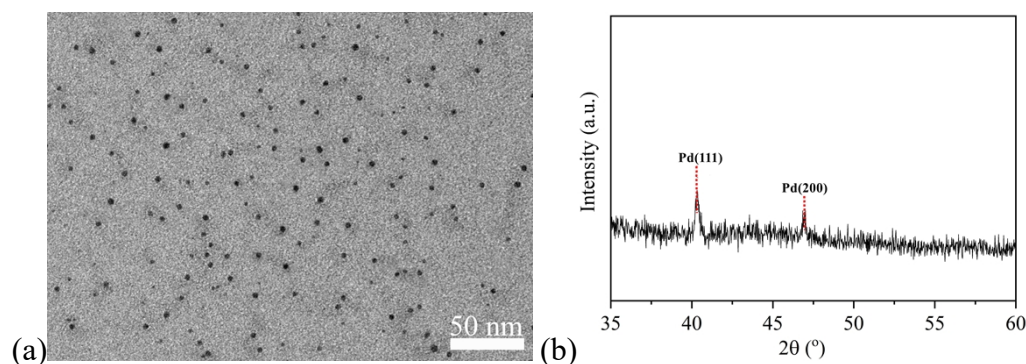

**Fig. S9** TEM image (a) and XRD pattern (b) of PVBC-cPMAA@Pd after reduction.

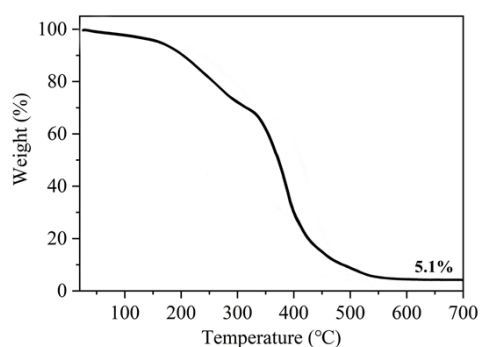

**Fig. S10** TGA trace of PVBC-cPMAA@Co-PDMEAMA.

Calculation of the weight fraction of PDMEAMA:

The weight fraction of Co in the PVBC-cPMAA@Co-PDMEAMA JNP is  $177/241 \times 5.1\% = 3.7\%$ . The weight ratio of the total polymer to Co is  $96.3/3.7 = 26.027$ . The weight ratio of the PVBC-cPMAA to Co is  $93.6/6.4 = 14.625$  based on the TGA data in Fig. S8. The weight ratio of PDMEAMA to Co is  $26.027 - 14.625 = 11.402$ . Therefore, the weight fraction of PDMEAMA in PVBC-cPMAA@Co-PDMEAMA is  $11.402 / (26.027 + 1) \times 100\% = 42.1\%$ .

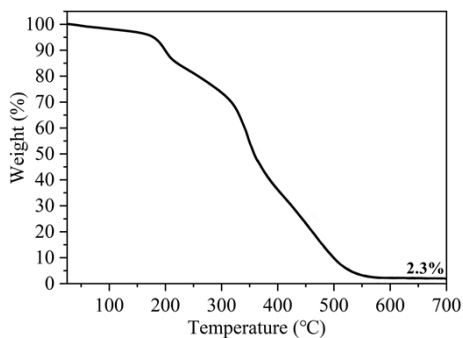

**Fig. S11** TGA trace of PVBC-*g*-PNIPAM-*c*PMAA@Co-PDMEAMA.

Calculation of the weight fraction of PNIPAM:

The weight fraction of Co in the PVBC-*g*-PNIPAM-*c*PMAA@Co-PDMEAMA JNP is  $177/241 \times 2.3\% = 1.7\%$ . The weight ratio of total polymer to Co is  $98.3/1.7 = 57.824$ . The weight ratio of the polymer of PVBC-*c*PMAA and PDMEAMA to Co is 26.027 as calculated in Fig. S10. The weight ratio of the PNIPAM to Co is  $57.824 - 26.027 = 31.796$ . Therefore, the weight fraction of PNIPAM in PVBC-*g*-PNIPAM-*c*PMAA@Co-PDMEAMA is  $31.796 / (57.824 + 1) \times 100\% = 54.1\%$ . The weight fraction of PDMEAMA in PVBC-*c*PMAA@Co-PDMEAMA is 42.1% as calculated in Fig. S12. Therefore, the weight fraction of PDMEAMA in PVBC-*g*-PNIPAM-*c*PMAA@Co-PDMEAMA is  $(1 - 0.541) \times 0.421 \times 100\% = 19.3\%$ . The weight ratio of PNIPAM/PDMEAMA =  $51.4/20.4 = 2.8/1.0$ .

Calculation of the average DP of the grafted PNIPAM side chain:

The weight fraction of PVBC to Co is  $11000 / (11000 + 112000) \times 93.6 / 6.4 = 7.247$  based on the TGA data in Fig. S6. The number of repeat unit of VBC is  $11000 / M_{VBC}(152.5) = 72$ . The weight ratio of PNIPAM/PVBC =  $31.796 / 7.247 = 4.371/1 = 72 \times M_{NIMA}(113) \times DP_{PNIPAM} / 11000$ .  $DP_{PNIPAM}$  is calculated to be  $\sim 6$ .

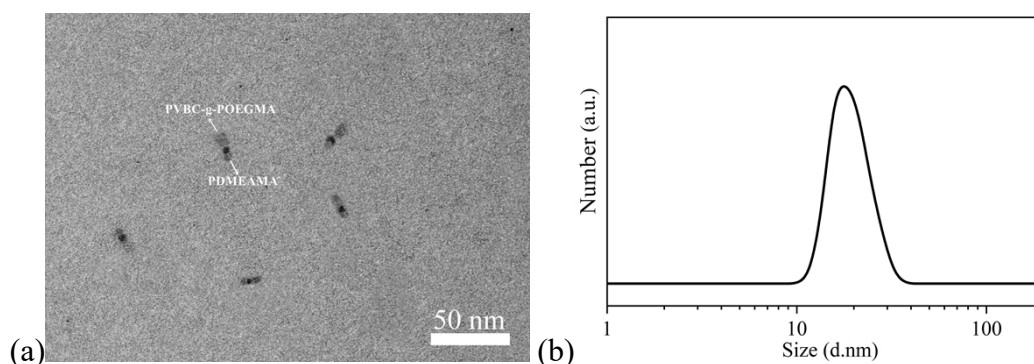

**Fig. S12** TEM image (a) and DLS trace (b) of PVBC-*g*-POEGMA-*c*PMAA@Co-PDMEAMA.

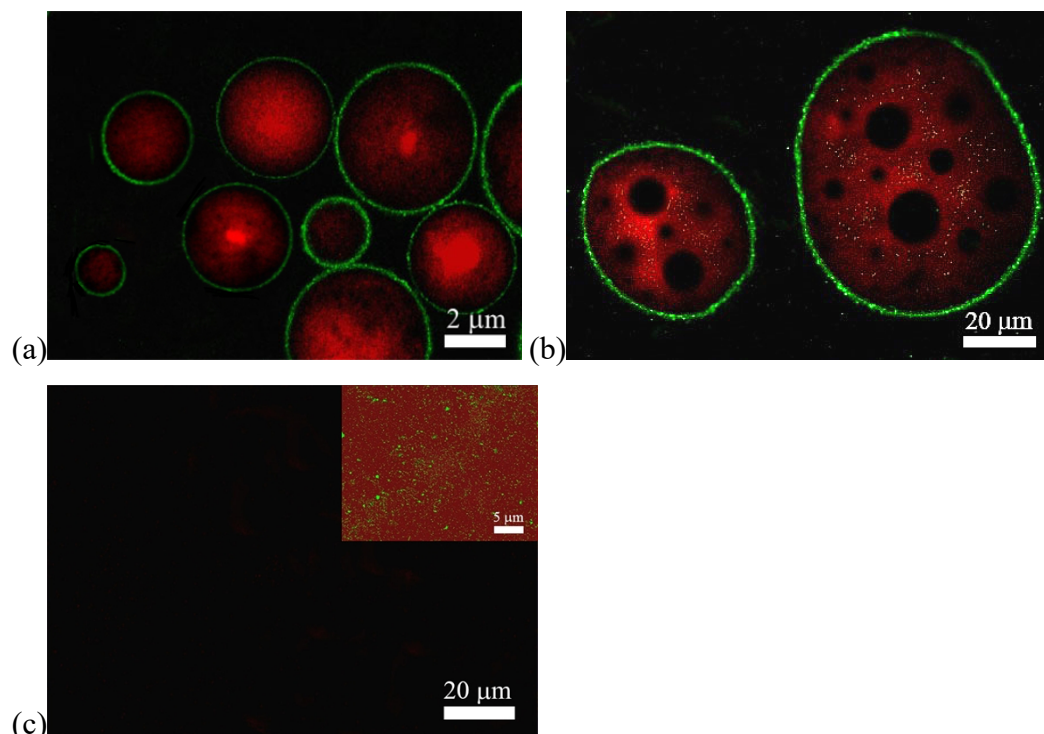

**Fig. S13** (a) Toluene/water emulsion stabilized with the PVBC-*g*-PNIPAM-*c*PMAA@Co-PDMEAMA JNP at 35 °C, pH=6 and (b) after increasing pH to 8; (c) CLSM images of bottom aqueous phase and inset the top oil phase after de-emulsification.

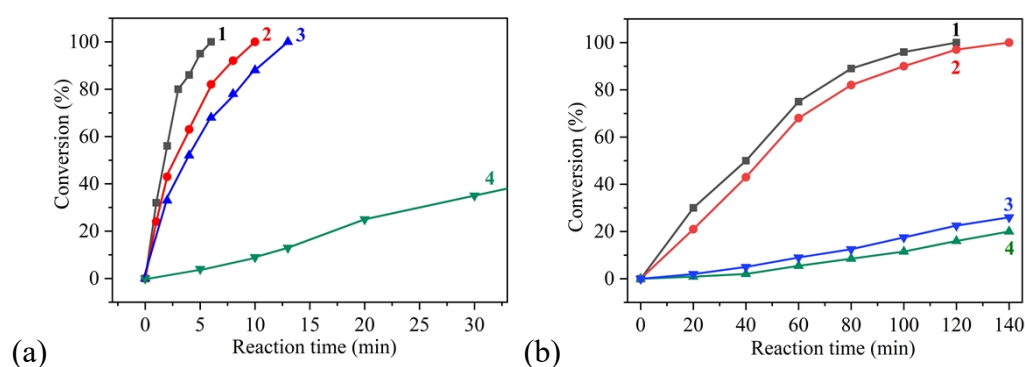

**Fig. S14** (a) The conversion of 4-nitrophenol (4-NP) to 4-aminophenol (4-AP) in aqueous solution along increasing reaction time, catalyzed by PVBC-*g*-PNIPAM-*c*PMAA@Co-PDMEAMA JNP at (1) 25 °C, pH=6, (2) 35 °C, pH=6, (3) 25 °C, pH=8 and (4) 35 °C, pH=8; (b) The conversion of nitrobenzene to aniline along increasing reaction time, catalyzed by PVBC-*g*-PNIPAM-*c*PMAA@Co-PDMEAMA JNP at (1) 35 °C, pH=6, (2) 25 °C, pH=8, (3)

25 °C, pH=6 and (4) 35 °C, pH=8.

## References

1. T. Zhou, T. Zhang, J. Deng, R. Zhang, Z. Lou and L. Wang, *Sensor Actu. B-Chem.*, 2017, **242**, 369-377.
